# Supplementary material for: Identification of immunologic subtype and prognosis of GBM based on TNFSF14 and immune checkpoint gene expression profiling
Source: publisher site journal article supplement (doi:10.18632/aging.103065), 2020-04-20
Supplement: Supplementary file [file aging-v12i8-103065-supplementary-material-SD1.pdf]

SUPPLEMENTARY MATERIALS

Supplementary Figures

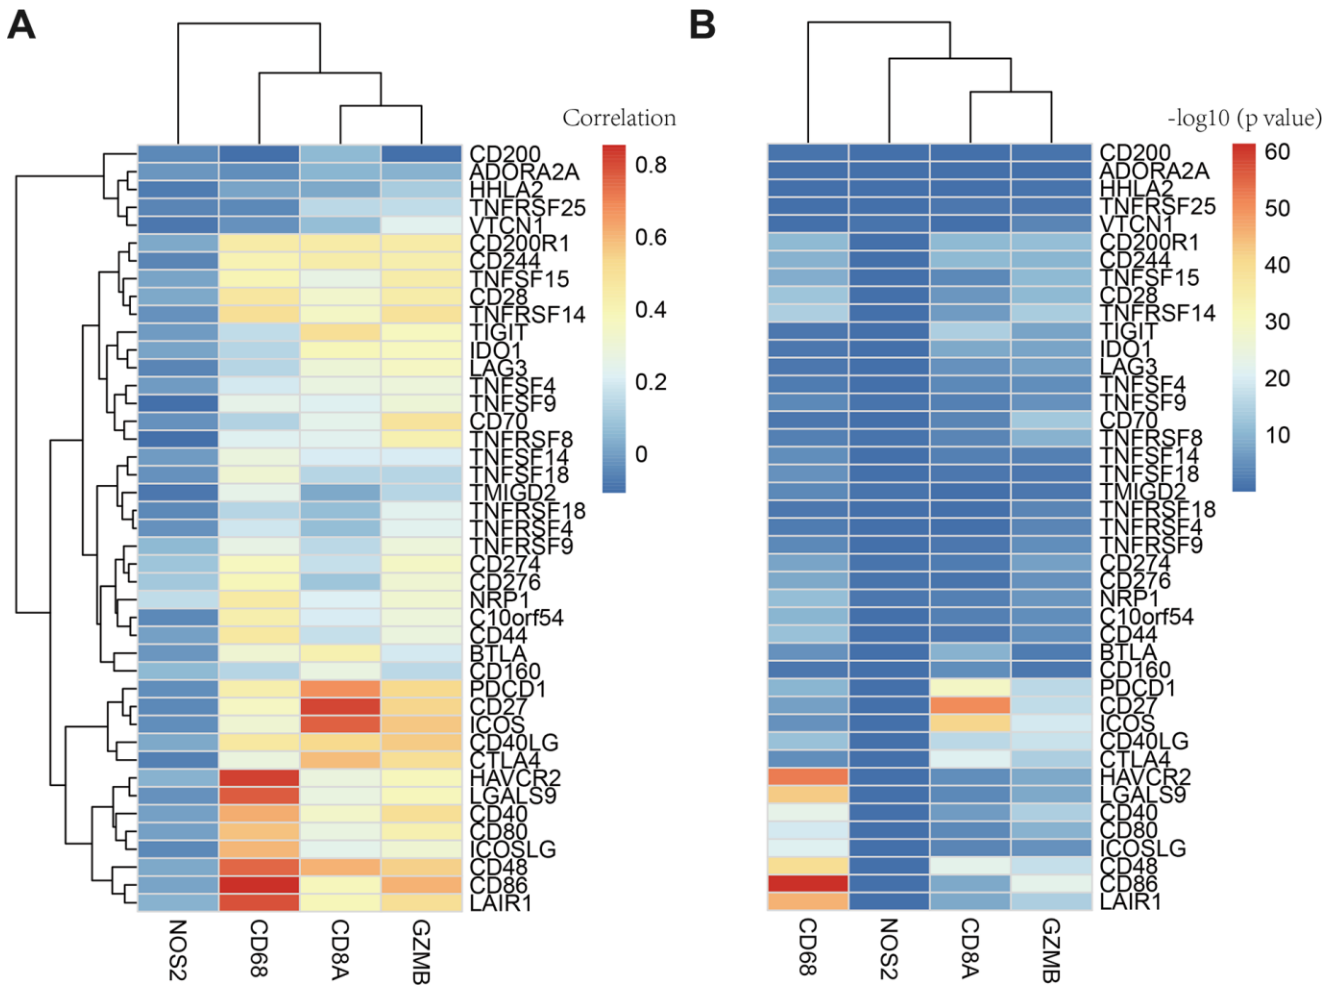

**Supplementary Figure 1.** (A) The heatmap of correlation coefficient between ICGs and adaptive immune resistance pathway genes in CGGA. (B) The P-value of correlation coefficient Test between ICGs and adaptive immune resistance pathway genes in CGGA. P-value has been performed as a-log10 conversion.

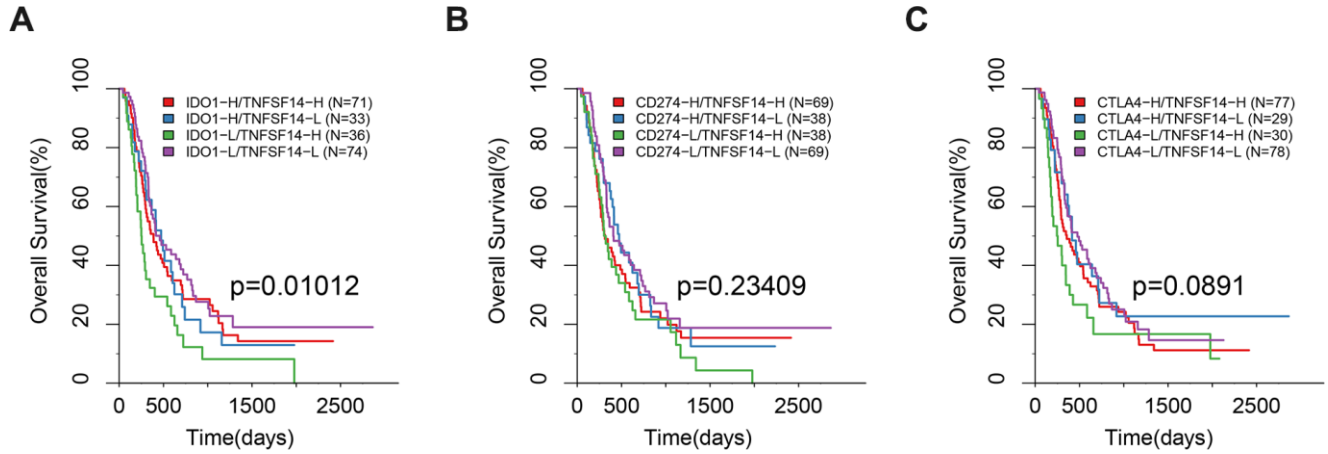

**Supplementary Figure 2. Survival KM plot by a combined analysis of ICGs and TNFSF14 expression in CGGA.** (A) Survival based on high/low IDO-1 expression and TNFSF14 expression. (B) Survival based on high/low CD274 expression and TNFSF14 expression. (C) Survival based on high/low CTLA-4 expression and TNFSF14 expression.
