# Supplementary material for: Identification of immunologic subtype and prognosis of GBM based on TNFSF14 and immune checkpoint gene expression profiling
Source: publisher site journal article supplement (doi:10.18632/aging.103065), 2020-04-20
Supplement: Supplementary file [file aging-v12i8-103065-supplementary-material-SD2.pdf]

ADORA2A  
BTLA  
BTNL2  
C10orf54  
CD160  
CD200  
CD200R1  
CD244  
CD27  
CD274  
CD276  
CD28  
CD40  
CD40LG  
CD44  
CD48  
CD70  
CD80  
CD86  
CTLA4  
HAVCR2  
HHLA2  
ICOS  
ICOSLG  
IDO1  
IDO2  
KIR3DL1  
LAG3  
LAIR1  
LGALS9  
NRP1  
PD1LG2  
PDCD1  
TIGIT  
TMIGD2  
TNFRSF14  
TNFRSF18  
TNFRSF25  
TNFRSF4  
TNFRSF8  
TNFRSF9  
TNFSF14  
TNFSF15  
TNFSF18  
TNFSF4  
TNFSF9  
VTCN1
